# Supplementary material
Source: publisher figshare collection journal article supplement (https://tandf.figshare.com/ndownloader/files/36013818)
Supplement: Supplementary file 1 [file 36013818]

**Supplemental Table 1.** Study 1 Spearman *p* correlations between decision making tasks

|  | IGT1 | IGT2 | IGT3 | IGT4 | IGT5 | IGT Total | CCT | GDT |
| --- | --- | --- | --- | --- | --- | --- | --- | --- |
| *Full Sample (n = 166)* | | |  |  |  |  |  |  |
| IGT1 | -- | -.120 | -.115 | -.181 | -.225* | .019 | .012 | .067 |
| IGT2 |  | -- | .482** | .448** | .294** | .638** | .046 | .056 |
| IGT3 |  |  | -- | .585** | .380** | .788** | -.071 | .085 |
| IGT4 |  |  |  | -- | .465** | .806** | -.037 | .095 |
| IGT5 |  |  |  |  | -- | .653** | -.061 | .031 |
| IGT Total |  |  |  |  |  | -- | .002 | .112 |
| CCT |  |  |  |  |  |  | -- | .012 |
| GDT |  |  |  |  |  |  |  | -- |
| *Nonclinical Controls (n = 43)* | | |  |  |  |  |
| IGT1 | -- | -.101 | -.009 | -.070 | -.292 | .037 | .020 | -.020 |
| IGT2 |  | -- | .464* | .422* | .129 | .611** | .108 | .099 |
| IGT3 |  |  | -- | .641** | .145 | .783** | -.127 | -.025 |
| IGT4 |  |  |  | -- | .310* | .755** | .004 | .141 |
| IGT5 |  |  |  |  | -- | .487** | -.042 | -.021 |
| IGT Total |  |  |  |  |  | -- | -.016 | .028 |
| CCT |  |  |  |  |  |  | -- | -.012 |
| GDT |  |  |  |  |  |  |  | -- |
| *Clinical Controls (n = 31)* | | |  |  |  |  |
| IGT1 | -- | -.124 | -.299 | -.307 | -.236 | -.115 | .150 | -.090 |
| IGT2 |  | -- | .659** | .574** | .547** | .790** | .119 | .217 |
| IGT3 |  |  | -- | .714** | .596** | .820** | .020 | .207 |
| IGT4 |  |  |  | -- | .576** | .822** | -.033 | .027 |
| IGT5 |  |  |  |  | -- | .766** | .017 | .105 |
| IGT Total |  |  |  |  |  | -- | .134 | .104 |
| CCT |  |  |  |  |  |  | -- | -.276 |
| GDT |  |  |  |  |  |  |  | -- |
| *Malinger-Pass WMT (n = 69)* | | |  |  |  |  |
| IGT1 | -- | -.178 | -.134 | -.270 | -.207 | .004 | -.024 | .169 |
| IGT2 |  | -- | .424** | .520** | .265 | .593** | .133 | -.005 |
| IGT3 |  |  | -- | .499** | .388** | .744** | -.015 | .142 |
| IGT4 |  |  |  | -- | .487** | .807** | .012 | .086 |
| IGT5 |  |  |  |  | -- | .685** | -.135 | .049 |
| IGT Total |  |  |  |  |  | -- | .014 | .164 |
| CCT |  |  |  |  |  |  | -- | .083 |
| GDT |  |  |  |  |  |  |  | -- |
| *Malinger-Fail WMT (n = 23)* | | |  |  |  |  |
| IGT1 | -- | -.195 | -.082 | -.123 | -.221 | .046 | .277 | .123 |
| IGT2 |  | -- | .468 | .085 | .284 | .485 | -.490 | -.153 |
| IGT3 |  |  | -- | .474 | .452 | .778** | -.318 | -.030 |
| IGT4 |  |  |  | -- | .532 | .728** | -.151 | .135 |
| IGT5 |  |  |  |  | -- | .733** | -.091 | -.099 |
| IGT Total |  |  |  |  |  | -- | -.181 | -.082 |
| CCT |  |  |  |  |  |  | -- | .215 |
| GDT |  |  |  |  |  |  |  | -- |

*Note*: WMT=Word Memory Test; IGT=Iowa Gambling Task, Advantageous (C+D) minus Disadvantageous (A+B) selections by 20-card blocks of trials (1-5) and across all 100 trials (total); CCT=Columbia Card Task, average cards per trial; GDT=Game of Dice Task, safe (3+4) minus risky (1+2) selections.

**p* *<* .01

***p* < .001

**Supplemental Table 2.** Study 2 Spearman p correlations between decision making tasks

|  | IGT1 | IGT2 | IGT3 | IGT4 | IGT5 | IGT Total | CCT | GDT |
| --- | --- | --- | --- | --- | --- | --- | --- | --- |
| *Full Sample (n = 130)* | | |  |  |  |  |  |  |
| IGT1 | -- | .173 | .118 | .127 | .051 | .375** | .064 | .140 |
| IGT2 |  | -- | .439** | .397** | .385** | .666** | -.101 | .123 |
| IGT3 |  |  | -- | .453** | .315** | .674** | -.107 | .122 |
| IGT4 |  |  |  | -- | .522** | .756** | -.092 | .241* |
| IGT5 |  |  |  |  | -- | .730** | -.167 | .141 |
| IGT Total |  |  |  |  |  | -- | -.143 | .198 |
| CCT |  |  |  |  |  |  | -- | -.050 |
| GDT |  |  |  |  |  |  |  | -- |
| *Nonclinical Controls (n = 48)* | | |  |  |  |  |  |  |
| IGT1 | -- | .155 | .272 | -.088 | -.128 | .235 | .107 | .369 |
| IGT2 |  | -- | .405* | .278 | .385 | .632** | -.248 | .246 |
| IGT3 |  |  | -- | .408* | .270 | .684** | -.099 | .238 |
| IGT4 |  |  |  | -- | .485* | .686** | -.414* | .301 |
| IGT5 |  |  |  |  | -- | .761** | -.209 | .120 |
| IGT Total |  |  |  |  |  | -- | -.314 | .322 |
| CCT |  |  |  |  |  |  | -- | -.155 |
| GDT |  |  |  |  |  |  |  | -- |
| *Combined Malinger-Pass PVTs (n = 58)* | | |  |  |  |  |  |  |
| IGT1 | -- | .158 | .015 | .227 | .213 | .451** | .138 | .039 |
| IGT2 |  | -- | .467** | .460** | .475** | .681** | .000 | .048 |
| IGT3 |  |  | -- | .60** | .471** | .725** | -.096 | .090 |
| IGT4 |  |  |  | -- | .644** | .837** | .034 | .254 |
| IGT5 |  |  |  |  | -- | .763** | -.048 | .253 |
| IGT Total |  |  |  |  |  | -- | .026 | .191 |
| CCT |  |  |  |  |  |  | -- | -.008 |
| GDT |  |  |  |  |  |  |  | -- |
| *Combined Malinger-Fail PVTs (n = 24)* | | |  |  |  |  |  |  |
| IGT1 | -- | .200 | .196 | .197 | -.059 | .417 | -.146 | -.005 |
| IGT2 |  | -- | .447 | .434 | .036 | .582** | .128 | .071 |
| IGT3 |  |  | -- | .239 | .118 | .572** | -.168 | .097 |
| IGT4 |  |  |  | -- | .332 | .668** | .165 | .220 |
| IGT5 |  |  |  |  | -- | .591** | -.175 | -.125 |
| IGT Total |  |  |  |  |  | -- | -.149 | .006 |
| CCT |  |  |  |  |  |  | -- | .075 |
| GDT |  |  |  |  |  |  |  | -- |
| *General Malinger-Pass PVTs (n = 30)* | | |  |  |  |  |  |  |
| IGT1 | -- | .234 | .016 | .170 | .041 | .441 | .199 | -.050 |
| IGT2 |  | -- | .595** | .338 | .363 | .668** | .182 | -.104 |
| IGT3 |  |  | -- | .590** | .287 | .745** | .012 | -.104 |
| IGT4 |  |  |  | -- | .506* | .798** | .138 | .233 |
| IGT5 |  |  |  |  | -- | .564* | .099 | .068 |
| IGT Total |  |  |  |  |  | -- | .205 | .062 |
| CCT |  |  |  |  |  |  | -- | .075 |
| GDT |  |  |  |  |  |  |  | -- |
| *General Malinger-Fail PVTs (n = 17)* | | |  |  |  |  |  |  |
| IGT1 | -- | .142 | .414 | .214 | -.117 | .317 | .013 | -.098 |
| IGT2 |  | -- | .326 | .727** | .105 | .602* | .131 | .058 |
| IGT3 |  |  | -- | .612* | .275 | .760** | -.142 | .186 |
| IGT4 |  |  |  | -- | .186 | .695** | .200 | .256 |
| IGT5 |  |  |  |  | -- | .602* | -.042 | -.293 |
| IGT Total |  |  |  |  |  | -- | -.098 | -.130 |
| CCT |  |  |  |  |  |  | -- | .439 |
| GDT |  |  |  |  |  |  |  | -- |
| *DM Malinger-Pass PVTs (n = 28)* | | |  |  |  |  |  |  |
| IGT1 | -- | .119 | .019 | .373 | .358 | .469 | .020 | .175 |
| IGT2 |  | -- | .307 | .605* | .602* | .685** | -.309 | .235 |
| IGT3 |  |  | -- | .673** | .599* | .654** | -.356 | .257 |
| IGT4 |  |  |  | -- | .803** | .937** | -.217 | .297 |
| IGT5 |  |  |  |  | -- | .920** | -.207 | .395 |
| IGT Total |  |  |  |  |  | -- | -.279 | .333 |
| CCT |  |  |  |  |  |  | -- | -.154 |
| GDT |  |  |  |  |  |  |  | -- |
| *DM Malinger-Fail PVTs (n = 7)* | | |  |  |  |  |  |  |
| IGT1 | -- | .363 | -.056 | .040 | -.118 | .506 | -.209 | .390 |
| IGT2 |  | -- | .638 | .053 | -.203 | .548 | .088 | .258 |
| IGT3 |  |  | -- | -.282 | -.084 | .282 | -.174 | -.014 |
| IGT4 |  |  |  | -- | .608 | .653 | .041 | .207 |
| IGT5 |  |  |  |  | -- | .449 | -.398 | .239 |
| IGT Total |  |  |  |  |  | -- | -.275 | .408 |
| CCT |  |  |  |  |  |  | -- | -.409 |
| GDT |  |  |  |  |  |  |  | -- |

**p* < .01

***p* < .001
